# Supplementary material for: Enhancement of the electroluminescence properties of iridium-complexes by decorating the ligand with hole-transporting carbazole dendrons
Source: Royal Society of Chemistry journal article supplement (doi:10.1039/d1nj00351h), 2021-01-01
Supplement: d1nj00351h1.pdf [file d1nj00351h1.pdf]

## Supporting Information

### Enhancement of electroluminescent property of iridium-complexes by decorating the ligand with hole-transporting carbazole dendrons

Yuranan Thathong<sup>a</sup>, Pongsakorn Chasing<sup>b</sup>, Thanaporn Manyum<sup>a</sup>, Supawadee Namuangruk<sup>c</sup>, Sayant Saengsuwan<sup>d</sup>, and Vinich Promarak<sup>\*be</sup>

<sup>a</sup>School of Chemistry, Institute of Science, Suranaree University of Technology, Muang District, Nakhon Ratchasima 30000, Thailand

<sup>b</sup>Department of Materials Science and Engineering, School of Molecular Science and Engineering, Vidyasirimedhi Institute of Science and Technology, Wangchan, Rayong 21210, Thailand

<sup>c</sup>National Nanotechnology Center (NANOTEC), 130 Thailand Science Park, Klong Luang, Pathumthani 12120, Thailand

<sup>d</sup>Department of Chemistry, Faculty of Science, Ubon Ratchathani University, Warinchumrap, Ubon Ratchathani 34190, Thailand

<sup>e</sup>Research Network of NANOTEC-VISTEC on Nanotechnology for Energy, Vidyasirimedhi Institute of Science and Technology, Wangchan, Rayong 21210, Thailand.

E-mail: [vinich.p@vistec.ac.th](mailto:vinich.p@vistec.ac.th)

#### Additional data

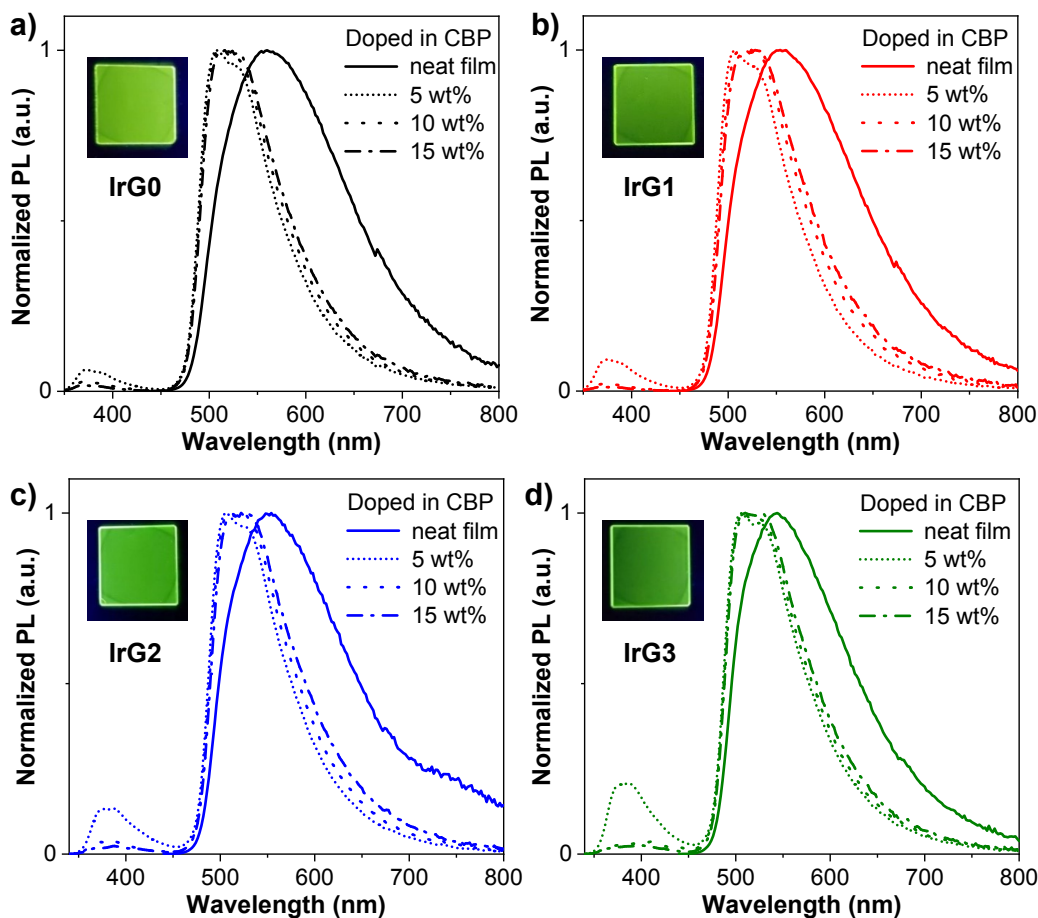

**Fig. S1** Normalized PL spectra of IrG0-IrG3 as neat film, 5, 10 and 15wt% doped in CBP (Insert: photograph of 10wt% doped films under illumination at 365 nm).

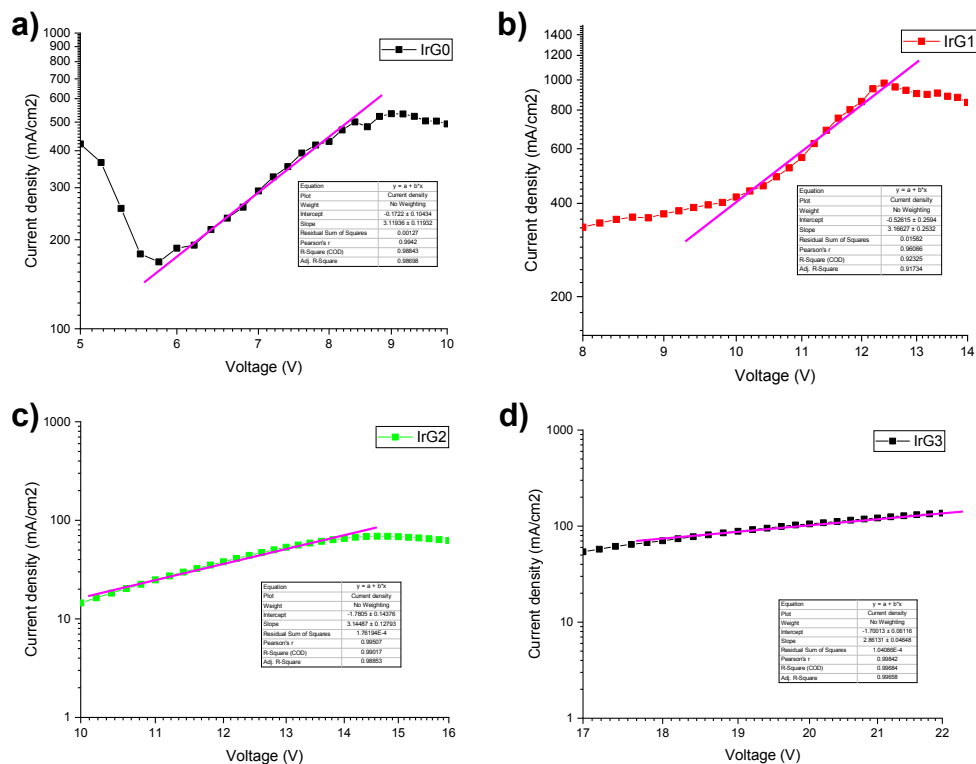

**Fig. S2** Current density-voltage ( $J$ - $V$ ) plots of hole only devices (ITO/PEDOT:PSS (35 nm)/IrG0-IrG3 (100 nm)/MoO<sub>3</sub> (10 nm)/Al (100 nm))

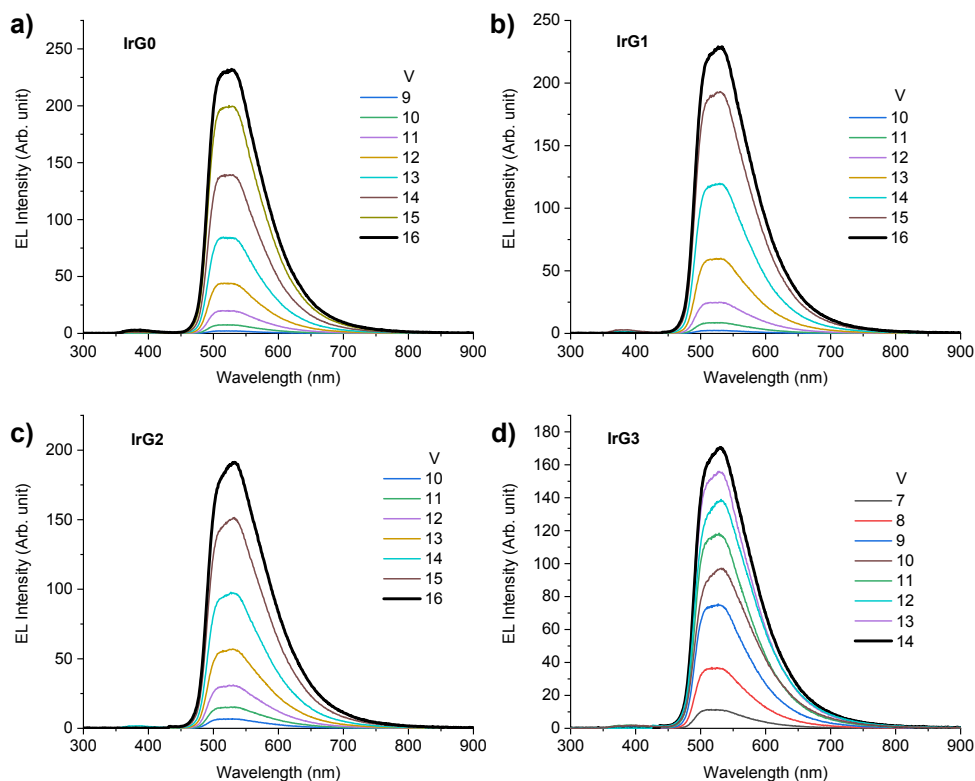

**Fig. S3** Electroluminescence (EL) spectra at various applied voltages of the fabricated OLEDs (ITO/PEDOT:PSS (40 nm)/IrG0-IrG3 10wt% doped in CBP (50 nm)/TmPyPB (40 nm)/LiF (0.5 nm)/Al (90 nm)).

**Fig. S4**  $^1\text{H}$  NMR and  $^{13}\text{C}$  NMR spectra  
Compound IrG0

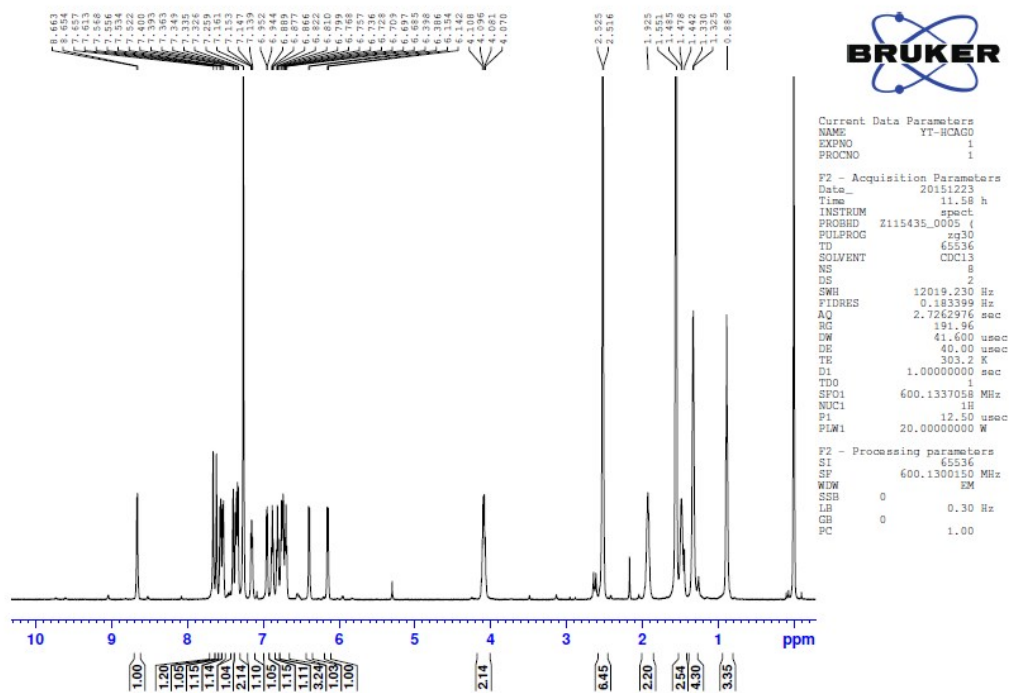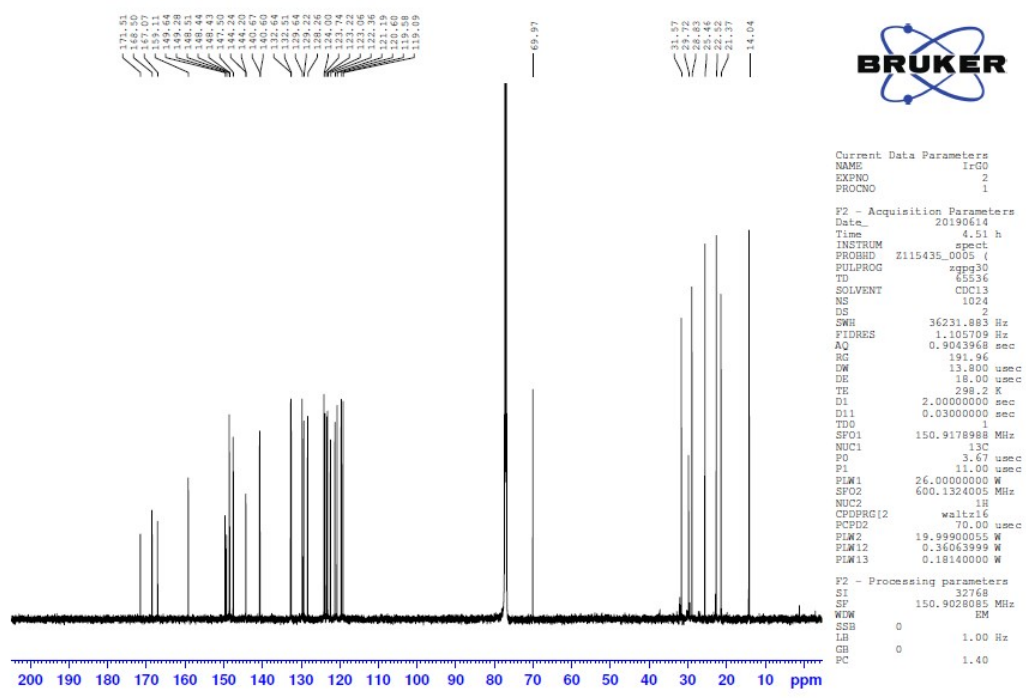



# Compound IrG2

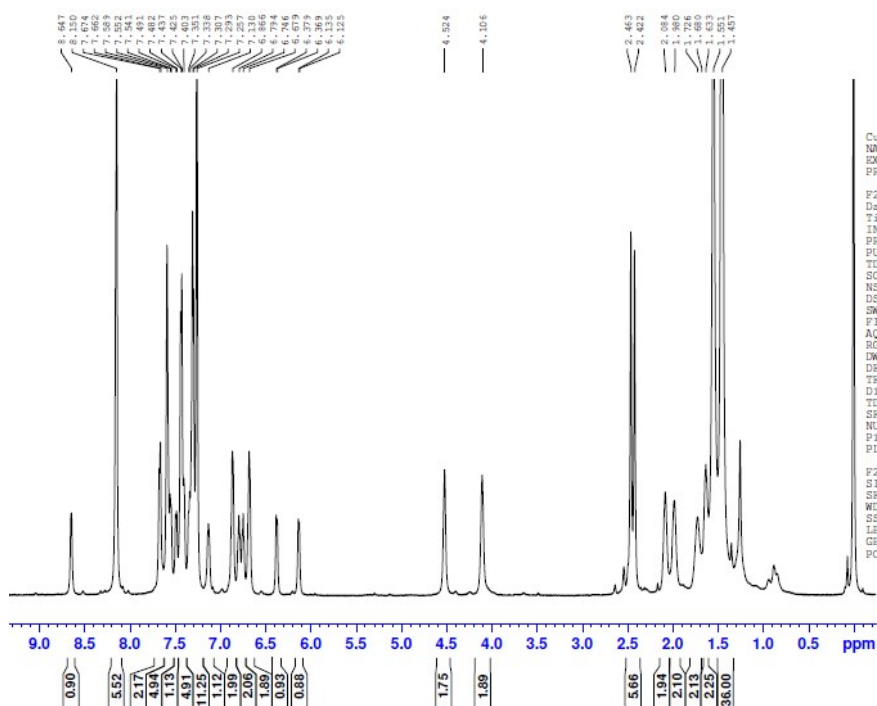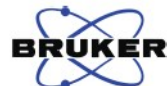

Current Data Parameters  
 NAME: vt-HCM02  
 EXPNO: 1  
 PROCNO: 1

F2 - Acquisition Parameters  
 Date\_: 20151222  
 Time: 10.33 h  
 INSTRUM: spect  
 PROBHD: Z115435\_0005 ( )  
 PULPROG: zg30  
 TD: 65536  
 SOLVENT: CDCl3  
 NS: 8  
 DS: 2  
 SWH: 12019.230 Hz  
 FIDRES: 0.183399 Hz  
 AQ: 2.7262976 sec  
 RG: 191.96  
 DW: 41.600 usec  
 DE: 40.00 usec  
 TE: 303.2 K  
 D1: 1.00000000 sec  
 TDO: 3  
 SFO1: 600.1337058 MHz  
 NUC1: 13  
 P1: 12.50 usec  
 PLW1: 20.00000000 W

F2 - Processing parameters  
 SI: 65536  
 SF: 600.1300162 MHz  
 WDW: EM  
 SSB: 0  
 LB: 0.30 Hz  
 GB: 0  
 PC: 1.00

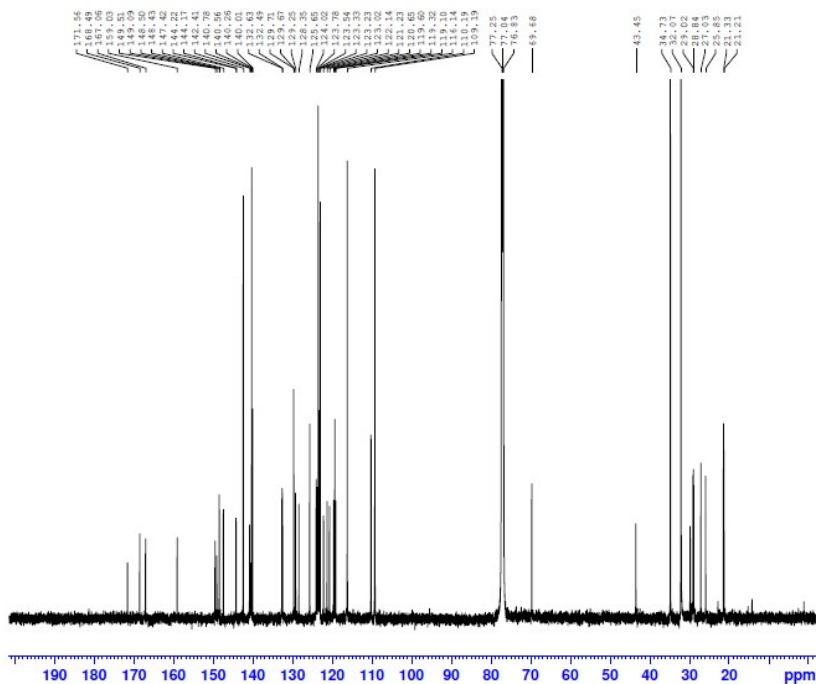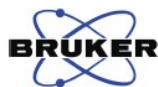

Current Data Parameters  
 NAME: IrG2\_C1024  
 EXPNO: 1  
 PROCNO: 1

F2 - Acquisition Parameters  
 Date\_: 20190617  
 Time: 22.46 h  
 INSTRUM: spect  
 PROBHD: Z115435\_0005 ( )  
 PULPROG: zgpg30  
 TD: 65536  
 SOLVENT: CDCl3  
 NS: 1024  
 DS: 2  
 SWH: 36231.883 Hz  
 FIDRES: 1.105709 Hz  
 AQ: 0.9043968 sec  
 RG: 191.96  
 DW: 13.800 usec  
 DE: 18.00 usec  
 TE: 298.1 K  
 D1: 2.00000000 sec  
 D11: 0.03000000 sec  
 TDO: 3  
 SFO1: 150.9178988 MHz  
 NUC1: 13C  
 P1: 3.67 usec  
 PLW1: 11.00 usec  
 PLW2: 26.00000000 W  
 SFO2: 600.1324005 MHz  
 NUC2: 1H  
 CPDPRG12: waltz16  
 PCPD2: 70.00 usec  
 PLW3: 19.99900055 W  
 PLW12: 0.36063998 W  
 PLW13: 0.18140000 W

F2 - Processing parameters  
 SI: 32768  
 SF: 150.9028085 MHz  
 WDW: EM  
 SSB: 0  
 LB: 1.00 Hz  
 GB: 0  
 PC: 1.40

# Compound IrG3

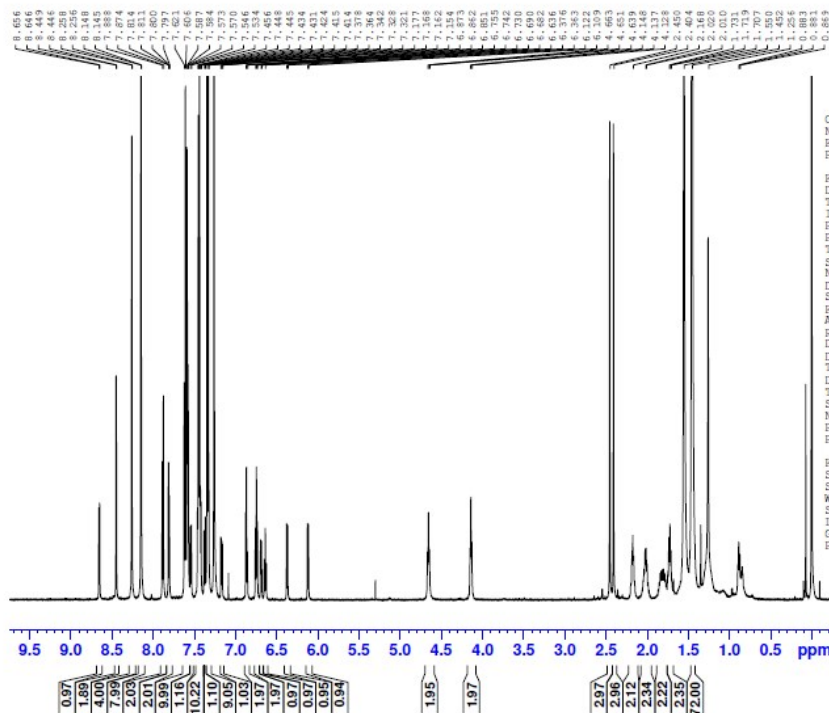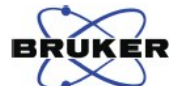

```

Current Data Parameters
NAME      YT-HCAG3
EXPNO    6
PROCNO   1

F2 - Acquisition Parameters
Date_    20160513
Time     15.47 h
INSTRUM  spect
PROBHD   Z115435_0005 (
PULPROG  zgpg30
TD        65536
SOLVENT  CDCl3
NS        8
DS        2
SWH       12019.230 Hz
FIDRES    0.366798 Hz
AQ        2.7262976 sec
RG        191.96
DW        41.600 usec
DE        40.00 usec
TE        303.2 K
D1        1.00000000 sec
TDO       1
SFO1      600.1337058 MHz
NUC1      1H
P1        9.30 usec
PLW1      20.00000000 W

F2 - Processing parameters
SI        65536
SF        600.1300156 MHz
WDW       EM
SSB       0
LB        0.30 Hz
GB        0
PC        1.00
    
```

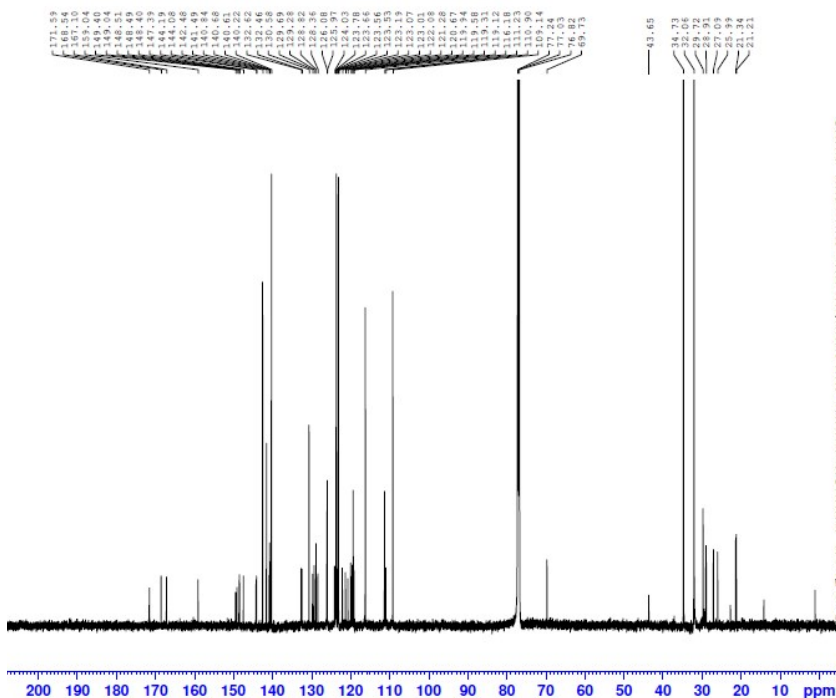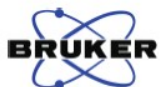

```

Current Data Parameters
NAME      IrG3_C1024
EXPNO    1
PROCNO   1

F2 - Acquisition Parameters
Date_    20190617
Time     23.39 h
INSTRUM  spect
PROBHD   Z115435_0005 (
PULPROG  zgpg30
TD        65536
SOLVENT  CDCl3
NS        1024
DS        2
SWH       36231.883 Hz
FIDRES    1.105709 Hz
AQ        0.9043968 sec
RG        191.96
DW        13.800 usec
DE        18.00 usec
TE        298.1 K
D1        2.00000000 sec
D11       0.03000000 sec
TDO       1
SFO1      150.9178988 MHz
NUC1      13C
PO        3.67 usec
P1        11.00 usec
PLW1      26.00000000 W
SFO2      600.1324005 MHz
NUC2      1H
CPDPRG12 waltz16
PCPD2     70.00 usec
PLW2      19.99900055 W
PLW3      0.36063999 W
PLW13     0.18140000 W

F2 - Processing parameters
SI        32768
SF        150.9028085 MHz
WDW       EM
SSB       0
LB        1.00 Hz
GB        0
PC        1.40
    
```



# Compound 2

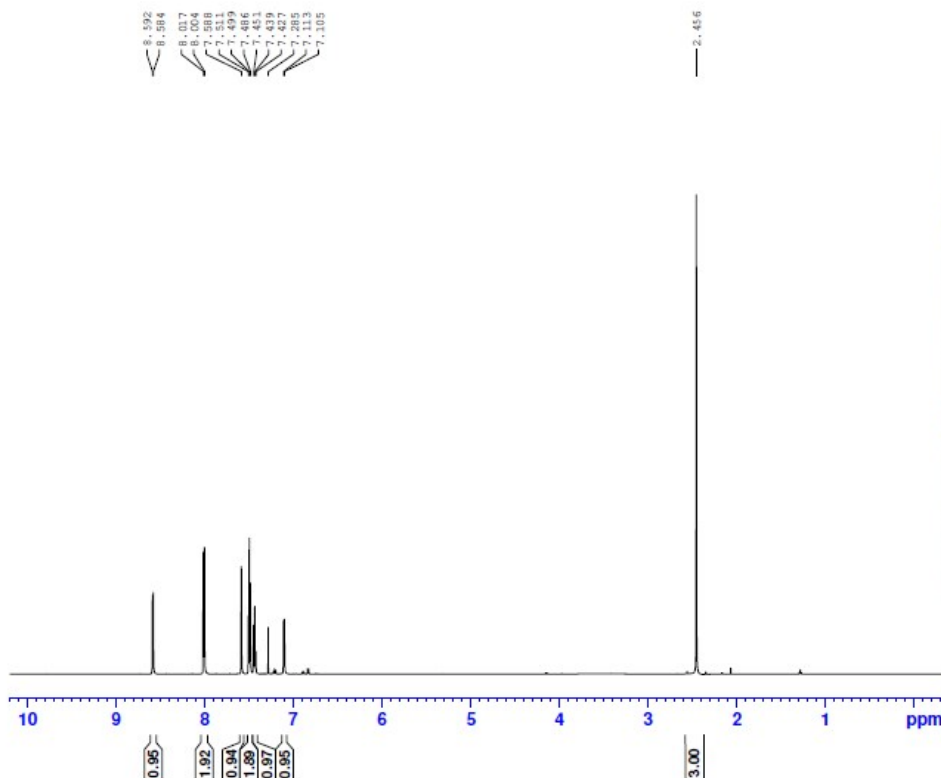

**BRUKER**

```

Current Data Parameters
NAME          YI-01
EXPNO         3
PROCNO        1

F2 - Acquisition Parameters
Date_         20161209
Time          13.57 h
INSTRUM       spect
PROBHD        Z115435_0005 (
PULPROG       zg30
TD            65536
SOLVENT       CDCl3
NS            8
DS            2
SWH           12019.230 Hz
FIDRES        0.366798 Hz
AQ            2.7262976 sec
RG            116.94
DW            41.600 usec
DE            40.00 usec
TE            303.1 K
D1            1.0000000 sec
TD0           1
SFO1          600.1337058 MHz
NUC1          1H
P1            9.00 usec
PLW1          20.0000000 W

F2 - Processing parameters
SI            65536
SF            600.1300000 MHz
WDW           EM
SSB           0
LB            0.30 Hz
GB            0
PC            1.00
    
```

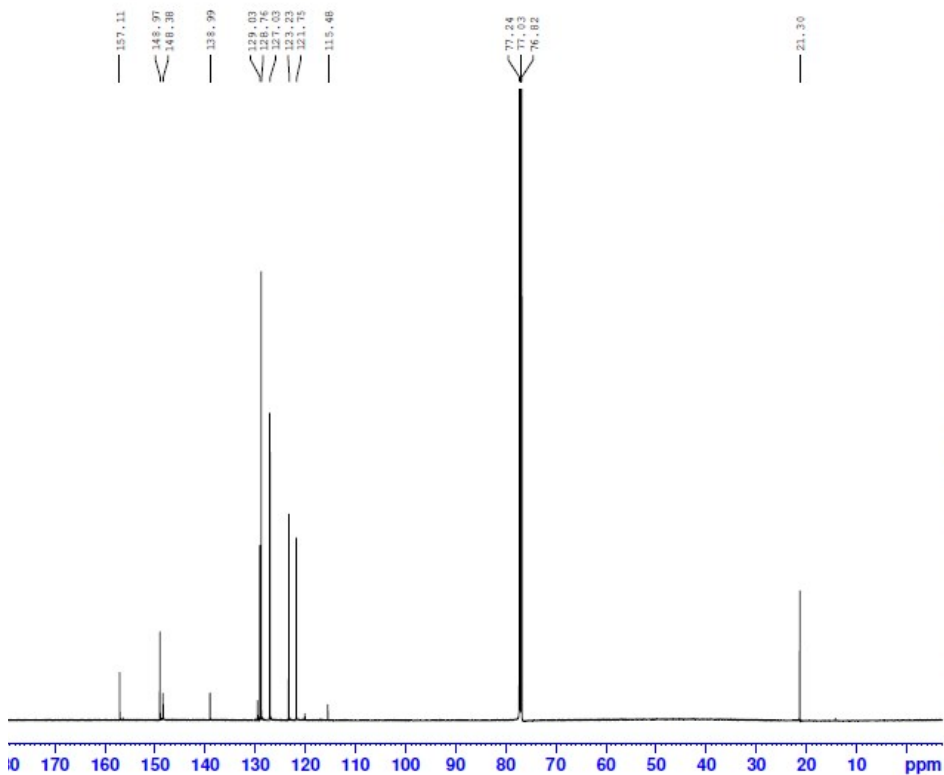

**BRUKER**

```

Current Data Parameters
NAME          YI-01
EXPNO         4
PROCNO        1

F2 - Acquisition Parameters
Date_         20161209
Time          18.04 h
INSTRUM       spect
PROBHD        Z115435_0005 (
PULPROG       zgpg30
TD            65536
SOLVENT       CDCl3
NS            256
DS            2
SWH           36231.883 Hz
FIDRES        1.105709 Hz
AQ            0.9043968 sec
RG            191.96
DW            13.800 usec
DE            18.00 usec
TE            303.2 K
D1            2.0000000 sec
D11           0.0300000 sec
TD0           1
SFO1          150.9178988 MHz
NUC1          13C
P1            11.00 usec
PLW1          26.0000000 W
SFO2          600.1324005 MHz
NUC2          1H
CPDPRG[2]    waltz16
PCPD2         70.00 usec
PLW2          20.0000000 W
PLW12         0.33061001 W
PLW13         0.16630000 W

F2 - Processing parameters
SI            32768
SF            150.9028085 MHz
WDW           EM
SSB           0
LB            1.00 Hz
GB            0
PC            1.40
    
```

# Compound 4

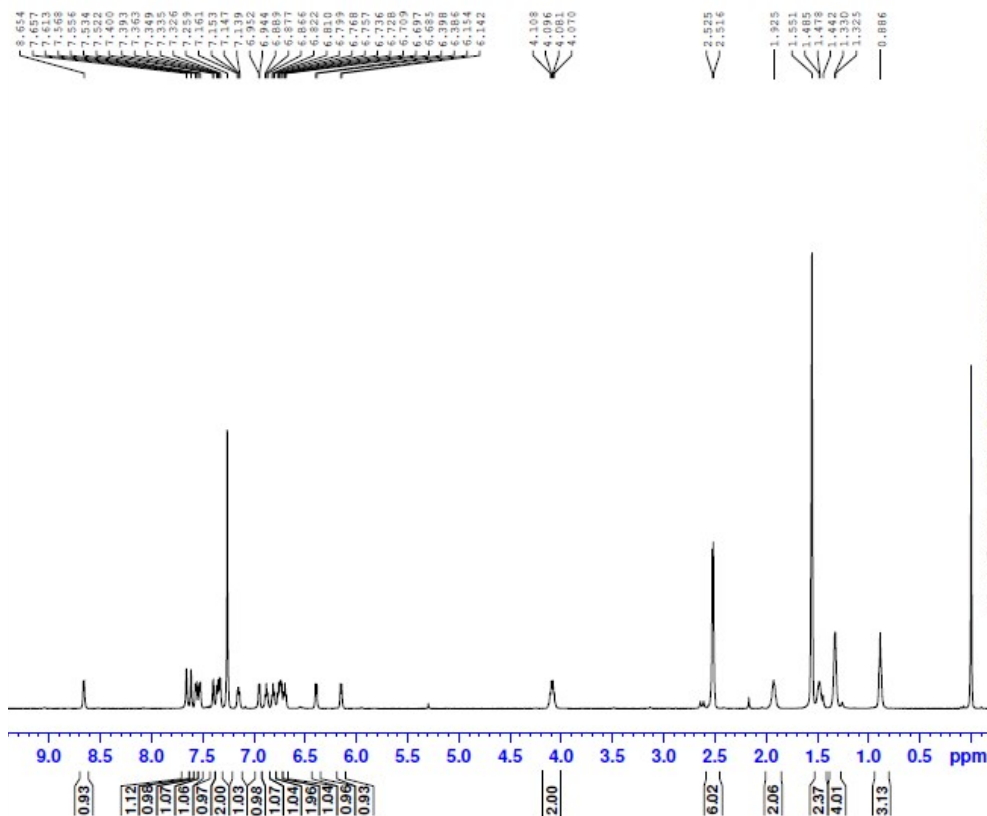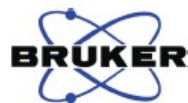

Current Data Parameters  
 NAME YF-HCAG0  
 EXPNO 1  
 PROCNO 1

F2 - Acquisition Parameters  
 Date\_ 20151223  
 Time 11.58 h  
 INSTRUM spect  
 PROBHD z115435\_0005 (zg30)  
 PULPROG zg30  
 TD 65536  
 SOLVENT CDCl3  
 NS 8  
 DS 2  
 SWH 12019.230 Hz  
 FIDRES 0.183399 Hz  
 AQ 2.7262976 sec  
 RC 191.96  
 DE 41.600 usec  
 TE 303.2 K  
 D1 1.00000000 sec  
 TD0 1  
 SFO1 600.1337058 MHz  
 NUC1 1H  
 P1 12.50 usec  
 PLW1 20.00000000 W

F2 - Processing parameters  
 SI 65536  
 SF 600.1300150 MHz  
 EM  
 SSB 0  
 LB 0.30 Hz  
 GB 0  
 PC 1.00

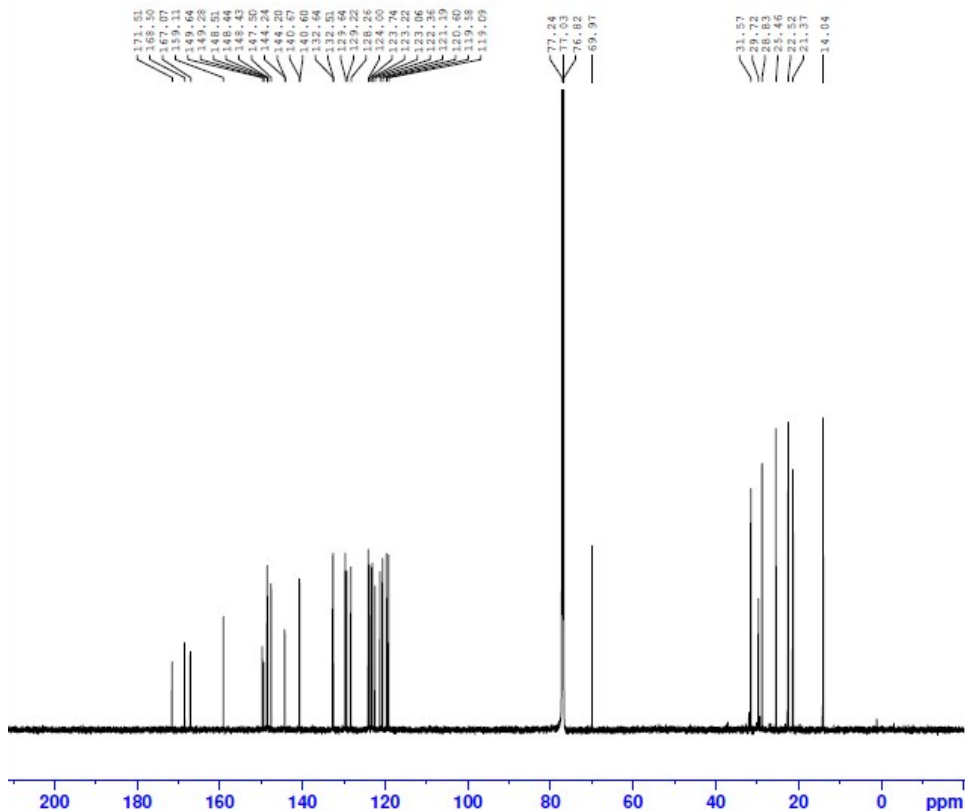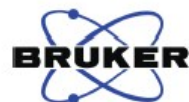

Current Data Parameters  
 NAME Irc0  
 EXPNO 2  
 PROCNO 1

F2 - Acquisition Parameters  
 Date\_ 20190614  
 Time 4.51 h  
 INSTRUM spect  
 PROBHD z115435\_0005 (zpg30)  
 PULPROG zpg30  
 TD 65536  
 SOLVENT CDCl3  
 NS 1024  
 DS 2  
 SWH 34231.883 Hz  
 FIDRES 1.105709 Hz  
 AQ 0.9043968 sec  
 RC 191.96  
 DE 13.800 usec  
 TE 298.2 K  
 D1 2.00000000 sec  
 D11 0.03000000 sec  
 TD0 1  
 SFO1 150.9178988 MHz  
 NUC1 13C  
 P0 3.67 usec  
 P1 11.00 usec  
 PLW1 26.00000000 W  
 SFO2 600.1324005 MHz  
 NUC2 1H  
 CPDPRG2 waltra6  
 PCPD2 70.00 usec  
 PLW2 19.99900055 W  
 PLW12 0.36063999 W  
 PLW13 0.18140000 W

F2 - Processing parameters  
 SI 32768  
 SF 150.9028085 MHz  
 EM  
 SSB 0  
 LB 1.00 Hz  
 GB 0  
 PC 1.40



# Compound L1

8.101  
8.099  
8.089  
7.514  
7.510  
7.497  
7.203  
7.289

4.267  
4.248

3.376  
3.364  
3.353

1.895  
1.893  
1.871  
1.849  
1.837  
1.826  
1.803  
1.829  
1.462  
1.425  
1.414

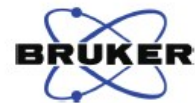

```

Current Data Parameters
NAME          Y1-L6
EXPNO        1
PROCNO       1

F2 - Acquisition Parameters
Date_        20151222
Time         10.40 h
INSTRUM      spect
PROBHD       Z115435_0005 (
PULPROG      zg30
TD           65536
SOLVENT      CDCl3
NS           8
DS           2
SWH          12019.230 Hz
FIDRES       0.183399 Hz
AQ           2.7262976 sec
RG           153.47
DM           41.600 usec
DE           40.00 usec
TE           303.1 K
D1           1.00000000 sec
TD0          1
SFO1         600.1337058 MHz
NUC1         1H
F1           12.50 usec
PLW1         20.00000000 W

F2 - Processing parameters
SI           65536
SF           600.1300143 MHz
WDW          EM
SSB          0
LB           0.30 Hz
GB           0
PC           1.00
    
```

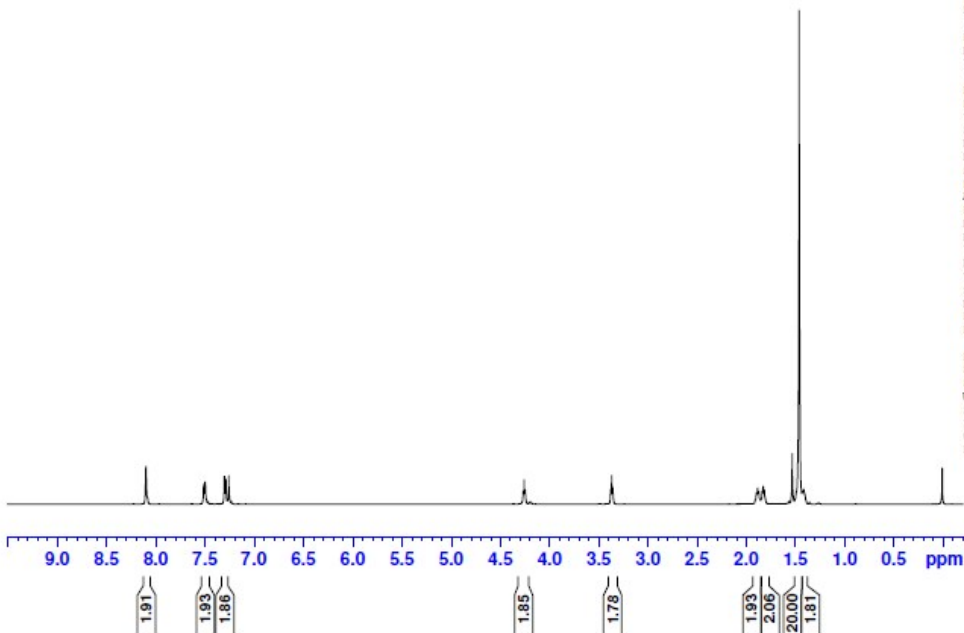

141.53  
138.96  
123.25  
122.71  
116.29  
107.96

77.22  
77.01  
76.80

42.96  
34.65  
33.71  
32.60  
28.98  
27.87  
26.50

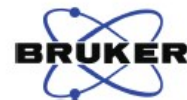

```

Current Data Parameters
NAME          Y1-L6.1
EXPNO        1
PROCNO       1

F2 - Acquisition Parameters
Date_        20151222
Time         11.57 h
INSTRUM      spect
PROBHD       Z115435_0005 (
PULPROG      zgpg30
TD           65536
SOLVENT      cdcl3
NS           32
DS           2
SWH          36231.883 Hz
FIDRES       0.552855 Hz
AQ           0.9043968 sec
RG           191.96
DM           13.800 usec
DE           18.00 usec
TE           303.1 K
D1           2.00000000 sec
D11          0.03000000 sec
TD0          1
SFO1         150.9178988 MHz
NUC1         13C
F1           10.50 usec
PLW1         26.00000000 W
SFO2         600.1324005 MHz
NUC2         1H
CPDPRG2      waltz16
PCPD2        70.00 usec
PLW2         20.00000000 W
PLW12        0.63775998 W
PLW13        0.32078999 W

F2 - Processing parameters
SI           32768
SF           150.9028085 MHz
WDW          EM
SSB          0
LB           1.00 Hz
GB           0
PC           1.40
    
```

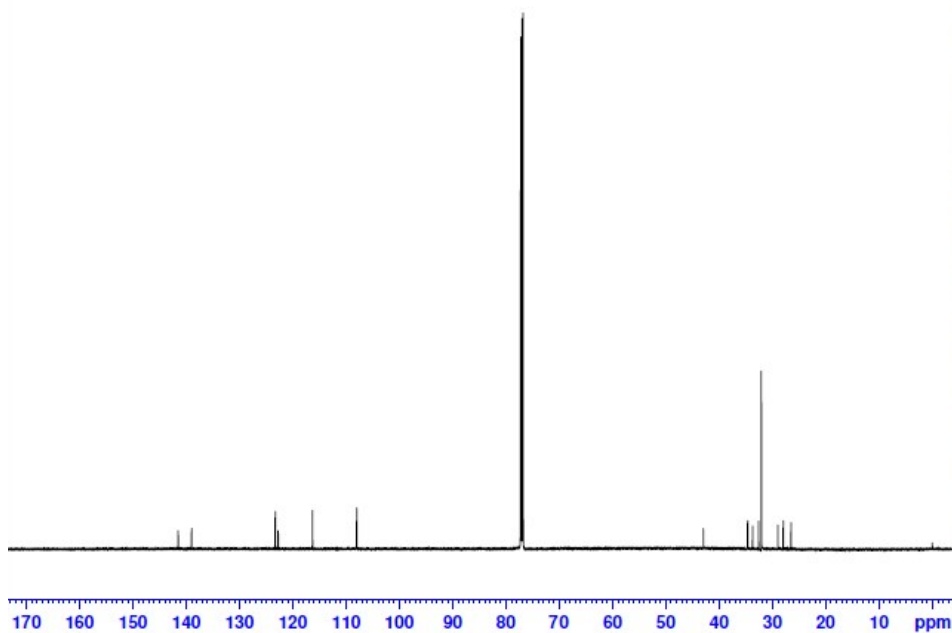

# Compound L2

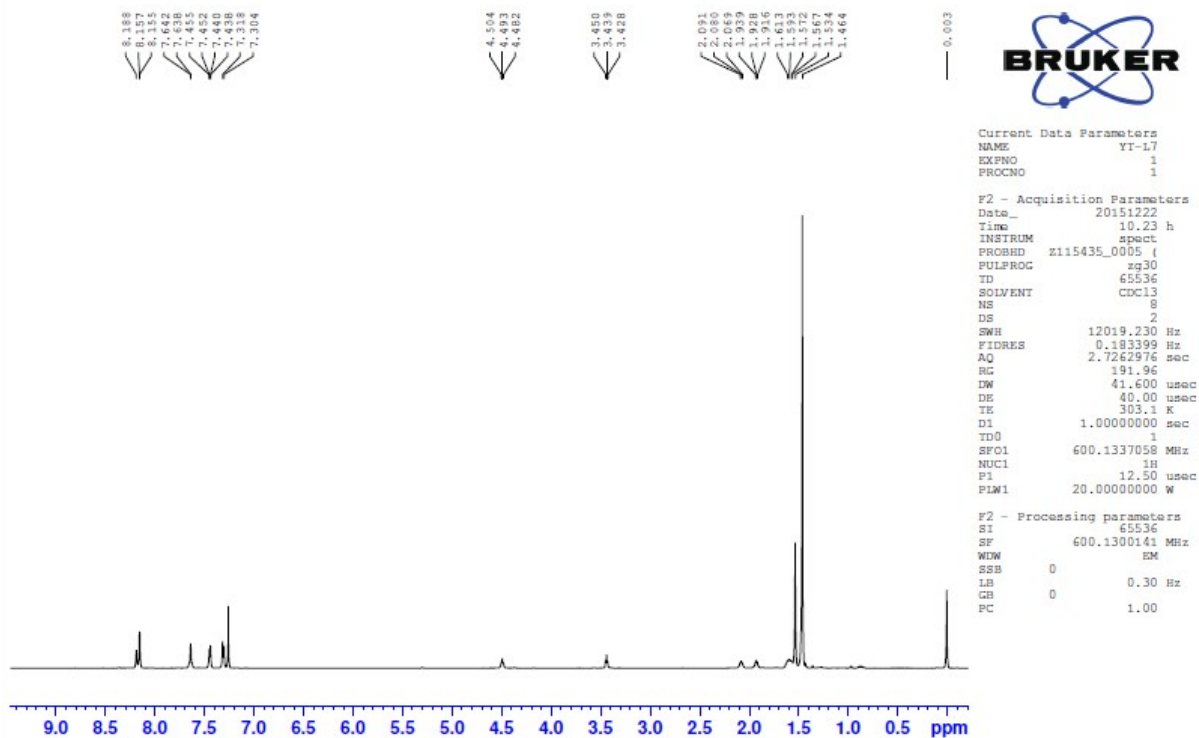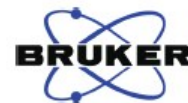

Current Data Parameters  
 NAME YT-17  
 EXPNO 1  
 PROCNO 1

F2 - Acquisition Parameters  
 Date\_ 20151222  
 Time 10.23 h  
 INSTRUM spect  
 PROBHD z115435\_0005 ( )  
 PULPROG zg30  
 TD 65536  
 SOLVENT CDC13  
 NS 8  
 DS 2  
 SWH 12019.230 Hz  
 FIDRES 0.183399 Hz  
 AQ 2.7262976 sec  
 RG 191.96  
 DW 41.600 usec  
 DE 40.00 usec  
 TE 303.1 K  
 D1 1.00000000 sec  
 TD0 1  
 SFO1 600.1337058 MHz  
 NUC1 1H  
 F1 12.50 usec  
 PLW1 20.00000000 W

F2 - Processing parameters  
 SI 65536  
 SF 600.1300141 MHz  
 WDW EM  
 SSB 0  
 LB 0.30 Hz  
 GB 0  
 PC 1.00

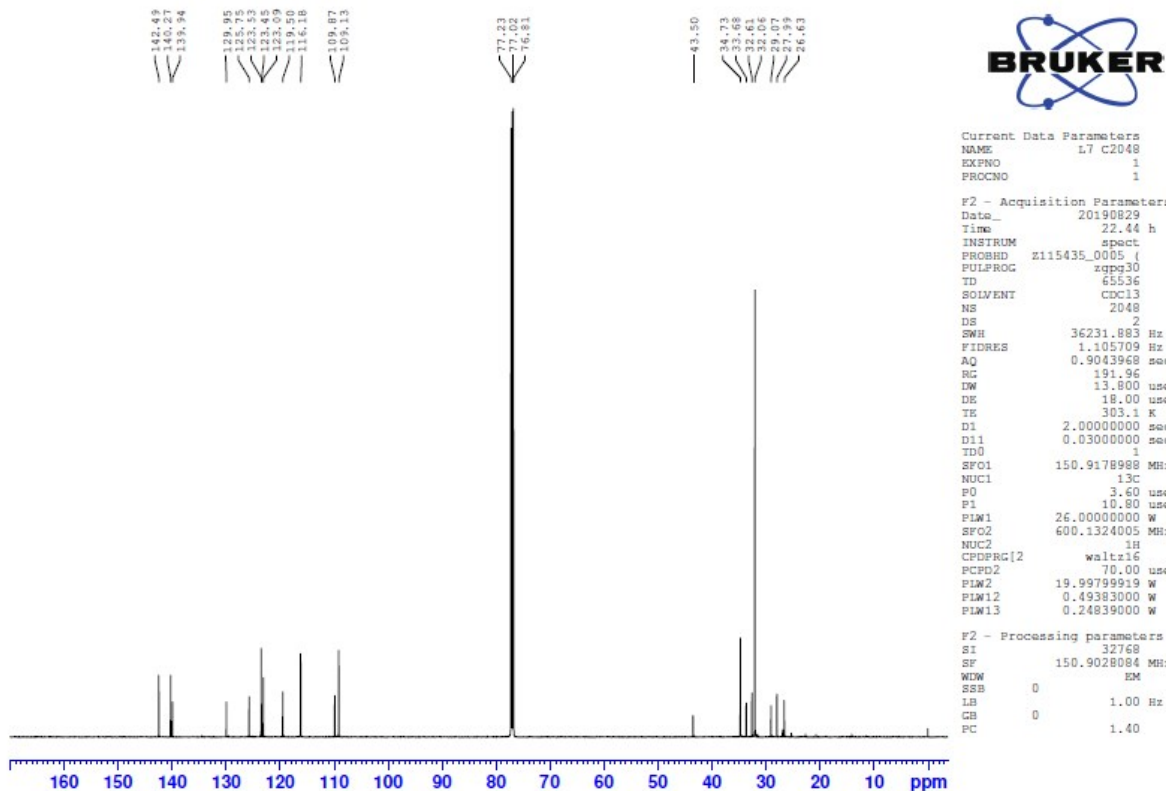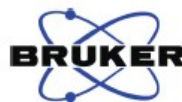

Current Data Parameters  
 NAME L7 C2048  
 EXPNO 1  
 PROCNO 1

F2 - Acquisition Parameters  
 Date\_ 20190829  
 Time 22.44 h  
 INSTRUM spect  
 PROBHD z115435\_0005 ( )  
 PULPROG zgpg30  
 TD 65536  
 SOLVENT CDC13  
 NS 2048  
 DS 2  
 SWH 36231.883 Hz  
 FIDRES 1.105709 Hz  
 AQ 0.9043968 sec  
 RG 191.96  
 DW 13.800 usec  
 DE 18.00 usec  
 TE 303.1 K  
 D1 2.00000000 sec  
 D11 0.03000000 sec  
 TD0 1  
 SFO1 150.9178988 MHz  
 NUC1 13C  
 P0 3.60 usec  
 P1 10.80 usec  
 PLW1 26.00000000 W  
 SFO2 600.1324005 MHz  
 NUC2 1H  
 CPDPRG2 waltz16  
 PCPD2 70.00 usec  
 PLW2 19.99799919 W  
 PLW12 0.49383000 W  
 PLW13 0.24839000 W

F2 - Processing parameters  
 SI 32768  
 SF 150.9028084 MHz  
 WDW EM  
 SSB 0  
 LB 1.00 Hz  
 GB 0  
 PC 1.40

# Compound L3

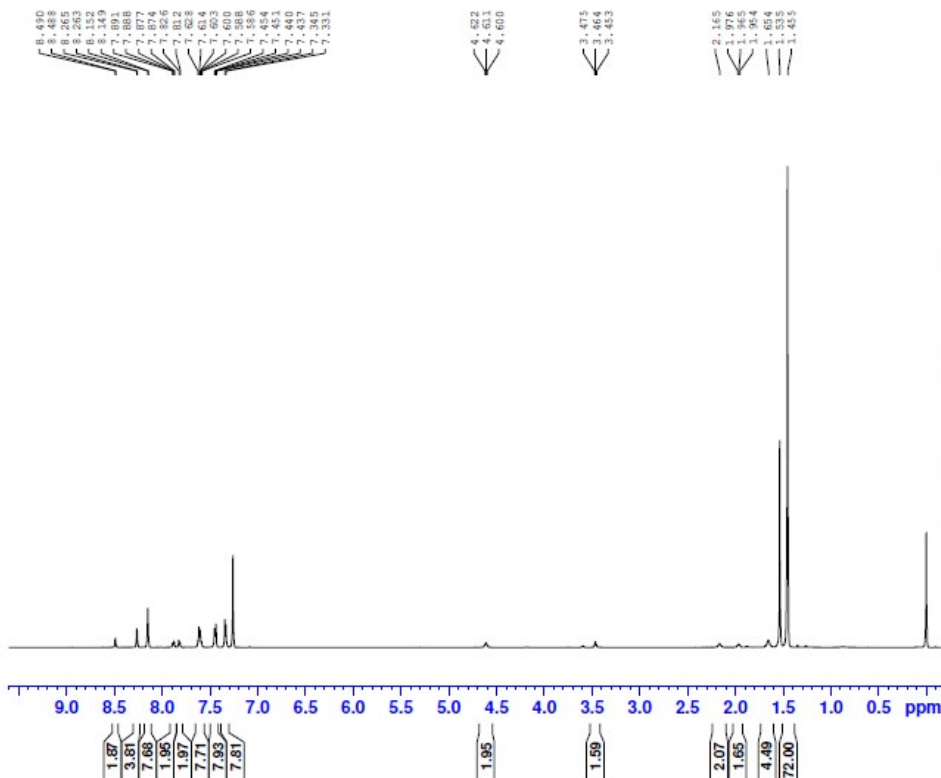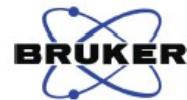

Current Data Parameters  
 NAME Y1-L8  
 EXPNO 1  
 PROCNO 1

F2 - Acquisition Parameters  
 Date\_ 20151222  
 Time 10.27 h  
 INSTRUM spect  
 PROBHD z115435\_0005 ( )  
 PULPROG zg30  
 TD 65536  
 SOLVENT CDCl3  
 NS 8  
 DS 2  
 SWH 12019.230 Hz  
 FIDRES 0.183399 Hz  
 AQ 2.7262976 sec  
 RG 191.96  
 DW 41.600 usec  
 DE 40.00 usec  
 TE 303.1 K  
 D1 1.00000000 sec  
 TD0 1  
 SFO1 600.1337058 MHz  
 NUC1 1H  
 P1 12.50 usec  
 PLW1 20.00000000 W

F2 - Processing parameters  
 SI 65536  
 SF 600.1300142 MHz  
 WDW EM  
 SSB 0  
 LB 0.30 Hz  
 GB 0  
 PC 1.00

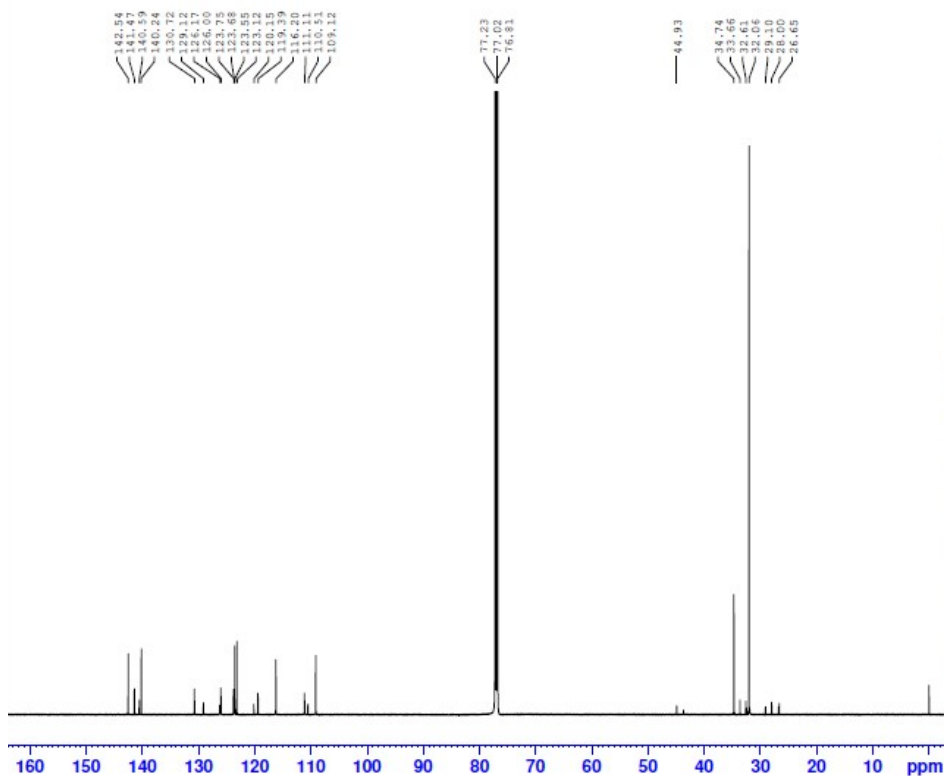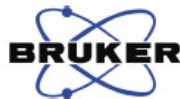

Current Data Parameters  
 NAME L8 C2048  
 EXPNO 1  
 PROCNO 1

F2 - Acquisition Parameters  
 Date\_ 20190830  
 Time 0.28 h  
 INSTRUM spect  
 PROBHD z115435\_0005 ( )  
 PULPROG zgpg30  
 TD 65536  
 SOLVENT CDCl3  
 NS 2048  
 DS 2  
 SWH 36231.883 Hz  
 FIDRES 1.105709 Hz  
 AQ 0.9043968 sec  
 RG 191.96  
 DW 13.800 usec  
 DE 18.00 usec  
 TE 303.2 K  
 D1 2.00000000 sec  
 D11 0.03000000 sec  
 TD0 1  
 SFO1 150.9178988 MHz  
 NUC1 13C  
 P0 3.60 usec  
 P1 10.80 usec  
 PLW1 26.00000000 W  
 SFO2 600.1324005 MHz  
 NUC2 1H  
 CPMPPG12 waltr16  
 PCPD2 70.00 usec  
 PLW2 19.99799919 W  
 PLW12 0.49383000 W  
 PLW13 0.24839000 W

F2 - Processing parameters  
 SI 32768  
 SF 150.9028066 MHz  
 WDW EM  
 SSB 0  
 LB 1.00 Hz  
 GB 0  
 PC 1.40

**Fig. S5** Copies of HRMS mass spectra  
Compound 4

D:\Data\MSE\POSD\Yuraman\YT-HCA1-2\0\_B1\1\15Ref

Comment 1  
Comment 2

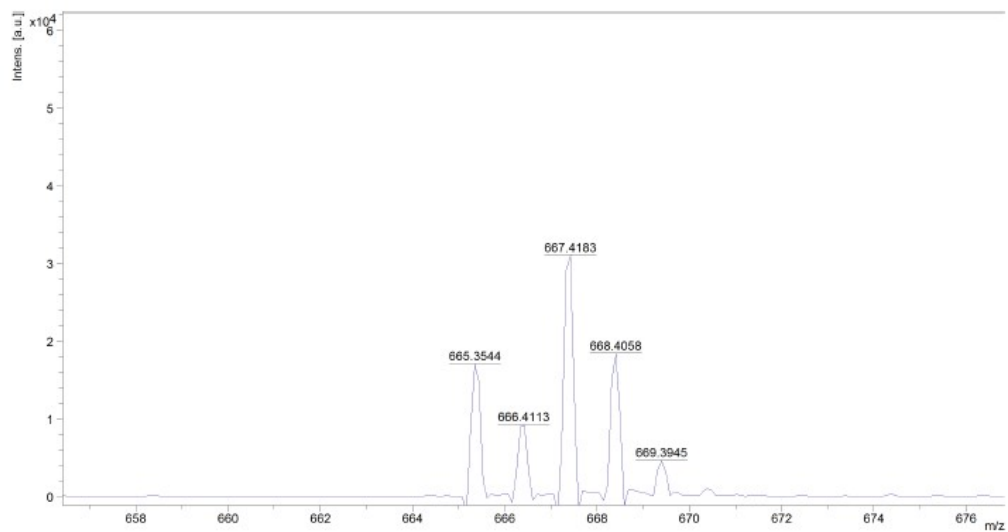

printed: 12/17/2016 11:07:21

### Compound IrG0

D:\Data\MSE\POSD\Yuraman\YT-HCAG0-2\0\_B5\1\15Ref

Comment 1  
Comment 2

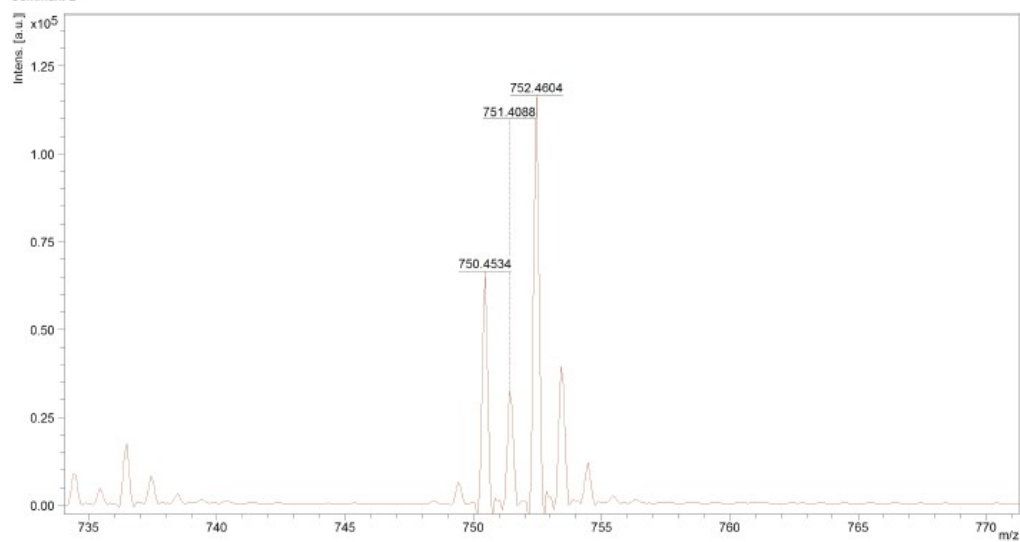

printed: 12/14/2016 11:44:31

## Compound IrG1

D:\Data\MSE\POSD\Yuranan\YT-HCAG1\0\_H23\1\1SRef

Comment 1

Comment 2

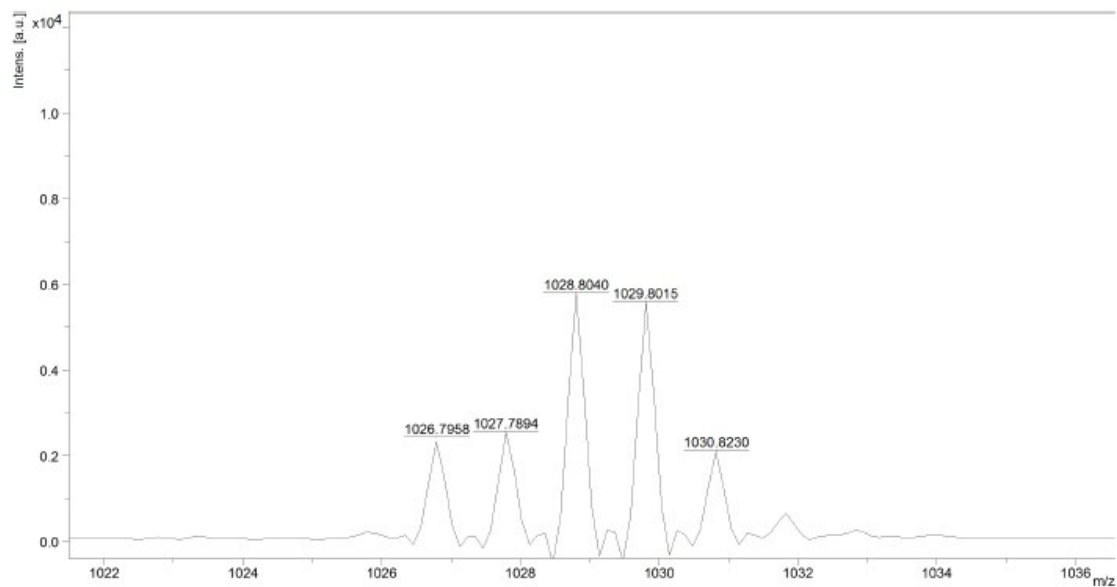

printed: 12/14/2016 12:35:28

## Compound IrG2

D:\Data\MSE\POSD\Yuranan\YT-HCAG2\0\_I1\1\1SRef

Comment 1

Comment 2

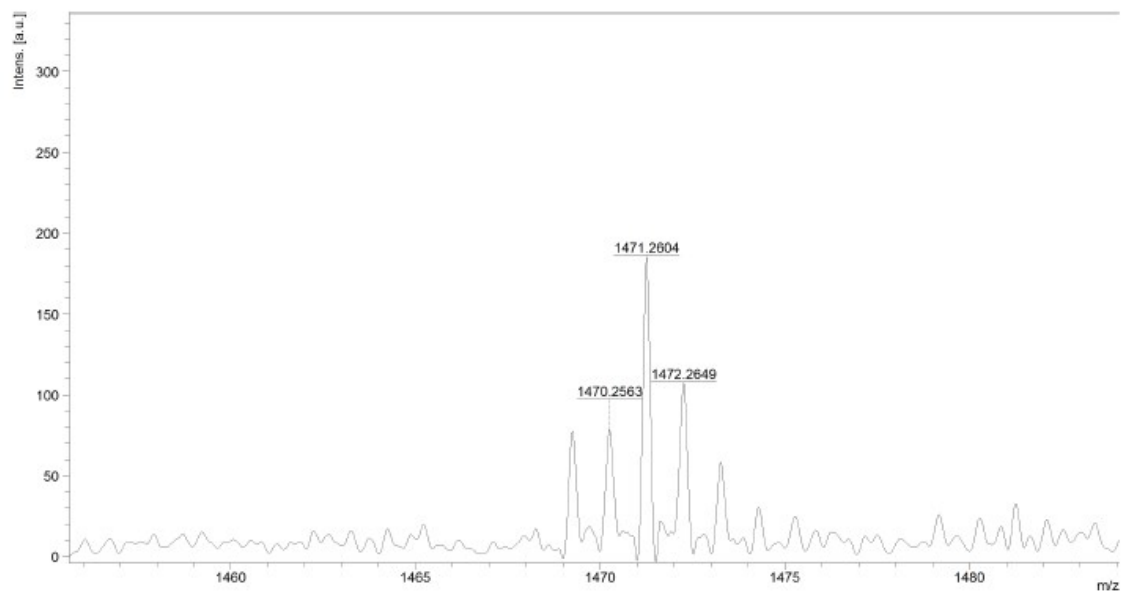

printed: 12/14/2016 11:48:48

# Compound IrG3

D:\Data\MSE\POSD\Yuranan\YT-HCAG3\0\_I5\1\1SRef

Comment 1  
Comment 2

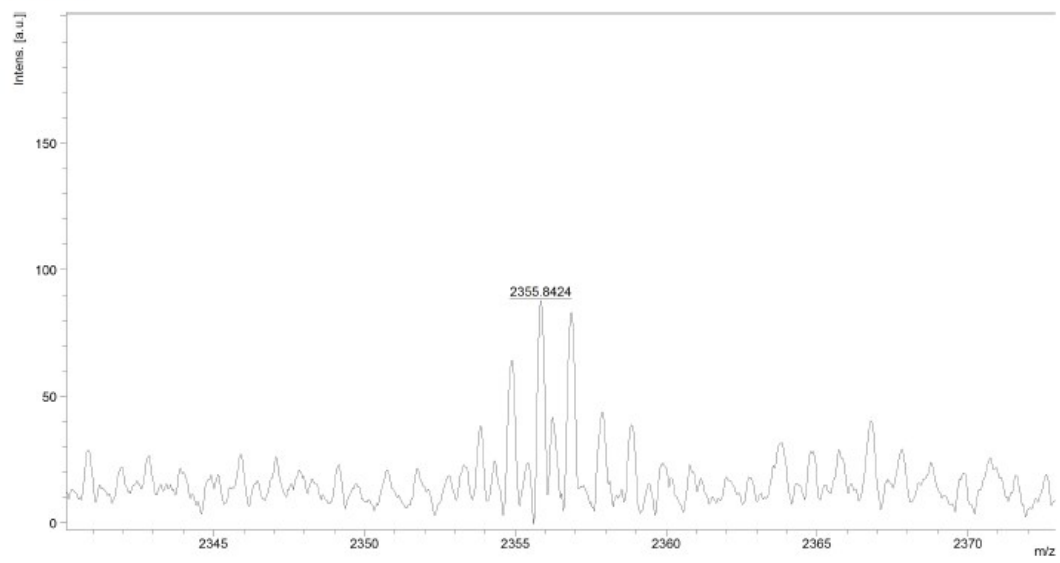

printed: 12/17/2016 11:21:34
